# Supplementary material
Source: PubMed Central journal article supplement (PMC7320910)
Supplement: EMS85985-supplement-Supplementary_Tables.pdf [file EMS85985-supplement-Supplementary_Tables.pdf]

1 **Supplementary Table 1: 33-fold FliF Cryo-EM data collection, refinement and validation statistics**

2

|                                                     | 33-fold FliF<br>Whole map<br>(EMD-10143)<br>(PDB-6SCN) | 33-fold FliF<br>RBM3/ $\beta$ -collar<br>(EMD-10145)<br>(PDB-6SD1) | 33-fold FliF<br>RBM2 <sub>inner</sub><br>(EMD-10146)<br>(PDB-6SD2) |
|-----------------------------------------------------|--------------------------------------------------------|--------------------------------------------------------------------|--------------------------------------------------------------------|
| <b>Data collection and processing</b>               |                                                        |                                                                    |                                                                    |
| Magnification                                       | 165,000                                                | 165,000                                                            | 165,000                                                            |
| Voltage (kV)                                        | 300                                                    | 300                                                                | 300                                                                |
| Electron exposure (e <sup>-</sup> /Å <sup>2</sup> ) | 48                                                     | 48                                                                 | 48                                                                 |
| Defocus range (μm)                                  | 0.5–4                                                  | 0.5–4                                                              | 0.5–4                                                              |
| Pixel size (Å)                                      | 0.822                                                  | 0.822                                                              | 0.822                                                              |
| Symmetry imposed                                    | C3                                                     | C33                                                                | C21                                                                |
| Initial particle images (no.)                       | 449142                                                 | 449142                                                             | 449142                                                             |
| Final particle images (no.)                         | 175233                                                 | 77849                                                              | 84797                                                              |
| Map resolution (Å)                                  | 3.1                                                    | 2.6                                                                | 2.9                                                                |
| FSC threshold                                       | 0.143                                                  | 0.143                                                              | 0.143                                                              |
| Map resolution range (Å)                            | 2.9-5.0                                                |                                                                    |                                                                    |
| <b>Refinement</b>                                   |                                                        |                                                                    |                                                                    |
| Initial model used (PDB code)                       | <i>Ab initio</i>                                       | <i>Ab initio</i>                                                   | <i>Ab initio</i>                                                   |
| Model resolution (Å)                                | 3.1                                                    | 2.6                                                                | 2.9                                                                |
| FSC threshold                                       | 0.143                                                  | 0.143                                                              | 0.143                                                              |
| Model resolution range (Å)                          |                                                        |                                                                    |                                                                    |
| Map sharpening <i>B</i> factor (Å <sup>2</sup> )    | -72                                                    | -62                                                                | -104                                                               |
| Model composition                                   |                                                        |                                                                    |                                                                    |
| Non-hydrogen atoms                                  | 60582                                                  | 39377                                                              | 13566                                                              |
| Protein residues                                    | 7875                                                   | 4984                                                               | 1848                                                               |
| Ligands                                             | 0                                                      | 0                                                                  | 0                                                                  |
| <i>B</i> factors (Å <sup>2</sup> )                  |                                                        |                                                                    |                                                                    |
| Protein                                             | 130                                                    | 53                                                                 | 59                                                                 |
| Ligand                                              | N/A                                                    | N/A                                                                | N/A                                                                |
| R.m.s. deviations                                   |                                                        |                                                                    |                                                                    |
| Bond lengths (Å)                                    | 0.007                                                  | 0.003                                                              | 0.009                                                              |
| Bond angles (°)                                     | 0.817                                                  | 0.442                                                              | 0.770                                                              |
| Validation                                          |                                                        |                                                                    |                                                                    |
| MolProbity score                                    | 2.0                                                    | 1.7                                                                | 2.4                                                                |
| Clashscore                                          | 13.0                                                   | 7.1                                                                | 6.7                                                                |
| Poor rotamers (%)                                   | 0.8                                                    | 0.0                                                                | 5.6                                                                |
| Ramachandran plot                                   |                                                        |                                                                    |                                                                    |
| Favored (%)                                         | 94.3                                                   | 95.7                                                               | 92.7                                                               |
| Allowed (%)                                         | 4.9                                                    | 4.3                                                                | 7.3                                                                |
| Disallowed (%)                                      | 0.8                                                    | 0.0                                                                | 0.0                                                                |

3

4

5

6

7

8

1 **Supplementary Table 2: 34-fold FliF Cryo-EM data collection, refinement and validation statistics**

2

|                                                     | 34-fold FliF<br>Whole map<br>(EMD-10147)<br>(PDB-6SD3) | 34-fold FliF<br>RBM3/ $\beta$ -collar<br>(EMD-10148)<br>(PDB-6SD4) | 34-fold FliF<br>RBM2 <sub>inner</sub><br>(EMD-10149)<br>(PDB-6SD5) |
|-----------------------------------------------------|--------------------------------------------------------|--------------------------------------------------------------------|--------------------------------------------------------------------|
| <b>Data collection and processing</b>               |                                                        |                                                                    |                                                                    |
| Magnification                                       | 165,000                                                | 165,000                                                            | 165,000                                                            |
| Voltage (kV)                                        | 300                                                    | 300                                                                | 300                                                                |
| Electron exposure (e <sup>-</sup> /Å <sup>2</sup> ) | 48                                                     | 48                                                                 | 48                                                                 |
| Defocus range (μm)                                  | 0.5–4                                                  | 0.5–4                                                              | 0.5–4                                                              |
| Pixel size (Å)                                      | 0.822                                                  | 0.822                                                              | 0.822                                                              |
| Symmetry imposed                                    | C2                                                     | C34                                                                | C22                                                                |
| Initial particle images (no.)*                      | 449142                                                 | 449142                                                             | 449142                                                             |
| Final particle images (no.)                         | 140606                                                 | 140606                                                             | 87107                                                              |
| Map resolution (Å)                                  | 3.3                                                    | 2.8                                                                | 3.1                                                                |
| FSC threshold                                       | 0.143                                                  | 0.143                                                              | 0.143                                                              |
| Map resolution range (Å)                            | 3.1-7.4                                                | 2.7-3.6                                                            | 3.0-3.9                                                            |
| <b>Refinement</b>                                   |                                                        |                                                                    |                                                                    |
| Initial model used (PDB code)                       | EMD-10143                                              | EMD-10143                                                          | EMD-10143                                                          |
| Model resolution (Å)                                | 3.3                                                    | 2.8                                                                | 3.1                                                                |
| FSC threshold                                       | 0.143                                                  | 0.143                                                              | 0.143                                                              |
| Model resolution range (Å)                          |                                                        |                                                                    |                                                                    |
| Map sharpening <i>B</i> factor (Å <sup>2</sup> )    | -67                                                    | -85                                                                | -103                                                               |
| Model composition                                   |                                                        |                                                                    |                                                                    |
| Non-hydrogen atoms                                  | 63144                                                  | 40562                                                              | 14212                                                              |
| Protein residues                                    | 8212                                                   | 5134                                                               | 1936                                                               |
| Ligands                                             | 0                                                      | 0                                                                  | 0                                                                  |
| <i>B</i> factors (Å <sup>2</sup> )                  |                                                        |                                                                    |                                                                    |
| Protein                                             | 139                                                    | 41                                                                 | 51                                                                 |
| Ligand                                              | N/A                                                    | N/A                                                                | N/A                                                                |
| R.m.s. deviations                                   |                                                        |                                                                    |                                                                    |
| Bond lengths (Å)                                    | 0.008                                                  | 0.009                                                              | 0.006                                                              |
| Bond angles (°)                                     | 0.824                                                  | 0.657                                                              | 0.617                                                              |
| Validation                                          |                                                        |                                                                    |                                                                    |
| MolProbity score                                    | 2.3                                                    | 1.9                                                                | 2.0                                                                |
| Clashscore                                          | 12.3                                                   | 5.7                                                                | 7.1                                                                |
| Poor rotamers (%)                                   | 1.2                                                    | 0.8                                                                | 1.4                                                                |
| Ramachandran plot                                   |                                                        |                                                                    |                                                                    |
| Favored (%)                                         | 88.5                                                   | 89.7                                                               | 91.7                                                               |
| Allowed (%)                                         | 10.8                                                   | 9.6                                                                | 8.3                                                                |
| Disallowed (%)                                      | 0.7                                                    | 0.7                                                                | 0.0                                                                |

3

4 \* Particle numbers quoted are post-2D clean-up

5

6

7

1 **Supplementary Table 3: 32-fold and 35-fold FliF Cryo-EM data collection, refinement and**  
 2 **validation statistics**

3

|                                                     | 32-fold FliF<br>RBM3/ $\beta$ -collar<br>(EMD-10560)<br>(PDB-6TRE) | 35-fold FliF<br>RBM3/ $\beta$ -collar<br>(EMD-10561) |
|-----------------------------------------------------|--------------------------------------------------------------------|------------------------------------------------------|
| <b>Data collection and processing</b>               |                                                                    |                                                      |
| Magnification                                       | 165,000                                                            | 165,000                                              |
| Voltage (kV)                                        | 300                                                                | 300                                                  |
| Electron exposure (e <sup>-</sup> /Å <sup>2</sup> ) | 48                                                                 | 48                                                   |
| Defocus range (μm)                                  | 0.5–4                                                              | 0.5–4                                                |
| Pixel size (Å)                                      | 0.822                                                              | 0.822                                                |
| Symmetry imposed                                    | C32                                                                | C35                                                  |
| Initial particle images (no.)*                      | 449142                                                             | 449142                                               |
| Final particle images (no.)                         | 33026                                                              | 42165                                                |
| Map resolution (Å)                                  | 3.3                                                                | 4.5                                                  |
| FSC threshold                                       | 0.143                                                              | 0.143                                                |
| Map resolution range (Å)                            | 3.2-6.0                                                            | 4.1-6.6                                              |
| <b>Refinement</b>                                   |                                                                    |                                                      |
| Initial model used (PDB code)                       | EMD-10143                                                          |                                                      |
| Model resolution (Å)                                | 3.3                                                                |                                                      |
| FSC threshold                                       | 0.143                                                              |                                                      |
| Model resolution range (Å)                          |                                                                    |                                                      |
| Map sharpening <i>B</i> factor (Å <sup>2</sup> )    | -106                                                               |                                                      |
| Model composition                                   |                                                                    |                                                      |
| Non-hydrogen atoms                                  | 38176                                                              |                                                      |
| Protein residues                                    | 4832                                                               |                                                      |
| Ligands                                             | 0                                                                  |                                                      |
| <i>B</i> factors (Å <sup>2</sup> )                  |                                                                    |                                                      |
| Protein                                             | 70                                                                 |                                                      |
| Ligand                                              | N/A                                                                |                                                      |
| R.m.s. deviations                                   |                                                                    |                                                      |
| Bond lengths (Å)                                    | 0.009                                                              |                                                      |
| Bond angles (°)                                     | 0.87                                                               |                                                      |
| Validation                                          |                                                                    |                                                      |
| MolProbity score                                    | 3.1                                                                |                                                      |
| Clashscore                                          | 18.4                                                               |                                                      |
| Poor rotamers (%)                                   | 11.3                                                               |                                                      |
| Ramachandran plot                                   |                                                                    |                                                      |
| Favored (%)                                         | 89.7                                                               |                                                      |
| Allowed (%)                                         | 10.3                                                               |                                                      |
| Disallowed (%)                                      | 0.0                                                                |                                                      |

4  
 5 \* Particle numbers quoted are post-2D clean-up  
 6  
 7  
 8

1

2
